# Supplementary material for: “Three-in-one” platform based on Fe-CDs nanozyme for dual-mode/dual-target detection and NIR-assisted bacterial killing
Source: Royal Society of Chemistry journal article supplement (doi:10.1039/d3tb00515a), 2023-01-01
Supplement: d3tb00515a1.pdf [file d3tb00515a1.pdf]

## Supporting Information

### **“Three-in-One” platform based on Fe-CDs nanozyme for dual-mode/dual-target detection and NIR assisted bacterial killing**

Mei Yang<sup>a, b, c</sup>, Jun Yao<sup>d</sup>, Borui Su<sup>a</sup>, Nini Xin<sup>a</sup>, Ting Zhou<sup>a</sup>, Mingze Zeng<sup>a</sup>, Chengheng Wu<sup>a</sup>, Dan Wei<sup>a</sup>, Jing Sun<sup>a</sup>, Hongsong Fan<sup>a, \*</sup>

<sup>a</sup> National Engineering Research Center for Biomaterials, College of Biomedical Engineering, Sichuan University, Chengdu 610064, Sichuan, PR China

<sup>b</sup> Key Laboratory of Green Catalysis of Higher Education Institutes of Sichuan, College of Chemistry and Environmental Engineering, Sichuan University of Science and Engineering, Zigong 643000, PR China

<sup>c</sup> Key Lab of Process Analysis and Control of Sichuan Universities, Yibin University, Yibin, 644000, PR China

<sup>d</sup> College of Food Science and Technology, Sichuan Tourism University, Chengdu 610100, PR China

\* Corresponding author at: National Engineering Research Center for Biomaterials, Sichuan University, Chengdu, 610064, China

E-mail addresses: [hsfan@scu.edu.cn](mailto:hsfan@scu.edu.cn) (Hongsong Fan)

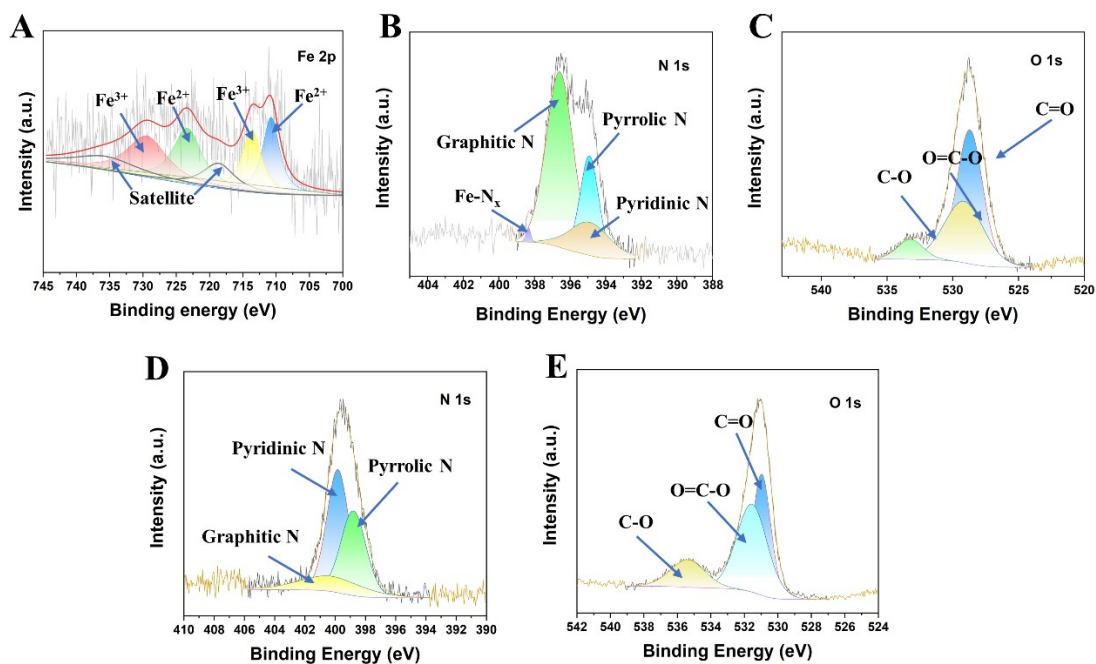

Fig. S1. XPS analysis of Fe-CDs and CDs. (A-C) Fe 2p, N 1s, and O 1s of Fe-CDs. (D, E) N 1s, and O 1s of CDs.

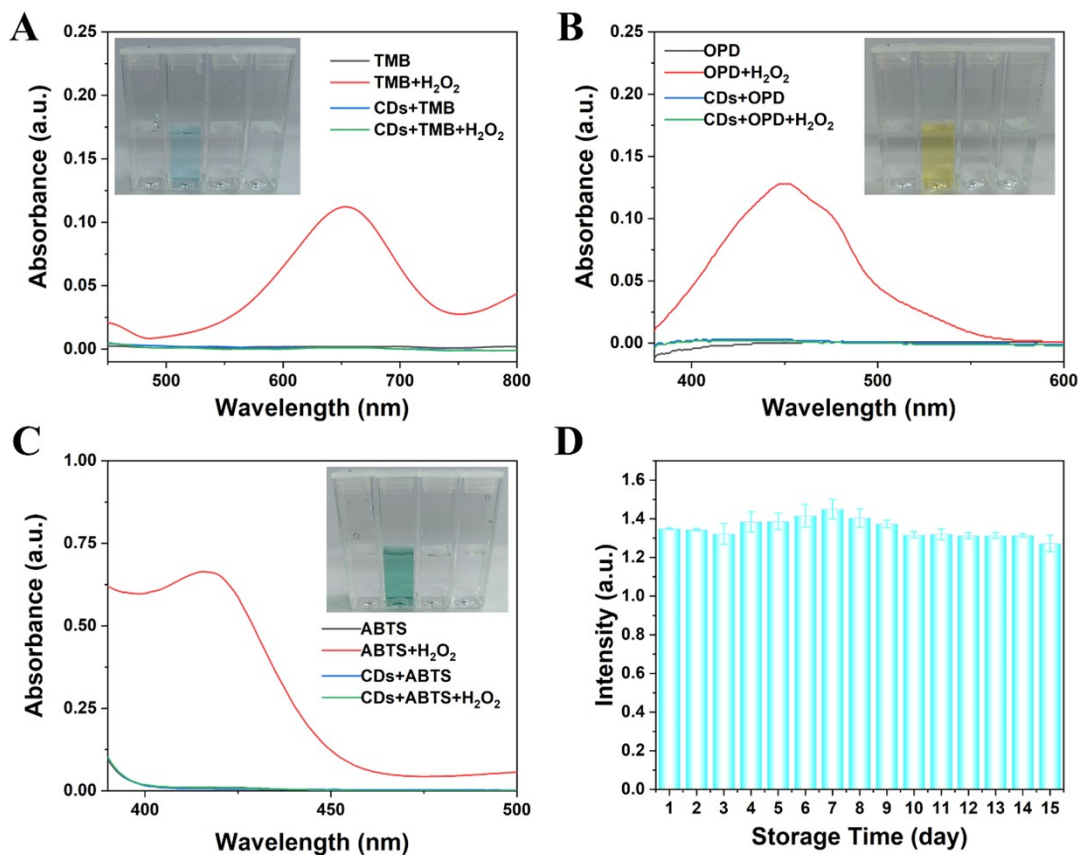

Fig. S2. (A-C) Absorbance of substrate, substrate + H<sub>2</sub>O<sub>2</sub>, CDs + substrate, CDs +

substrate +  $H_2O_2$ , the inset is the corresponding visual color changes. For A, B, and C, the substrate is TMB, OPD and ABTS, respectively. (D) Relative activity of Fe-CDs nanozymes within 15 days.

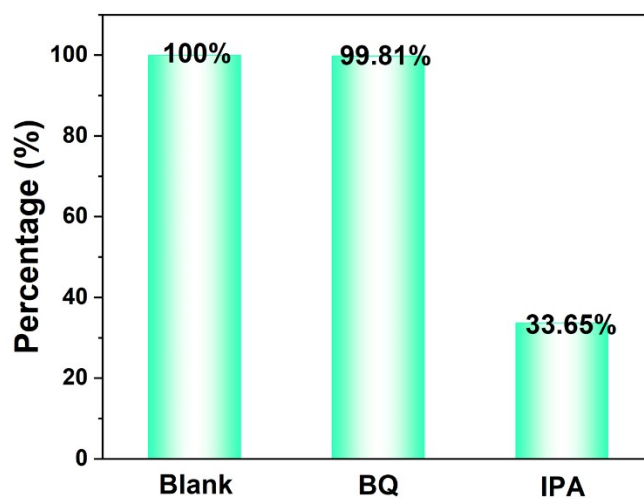

Fig. S3. Radical scavenger experiment of active free radicals.

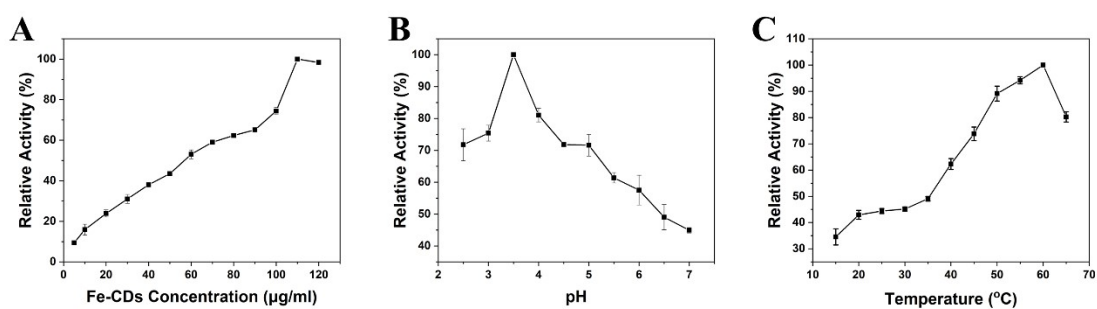

Fig. S4. The relative activity variation of Fe-CDs under different conditions. (A) Concentration, (B) pH, (C) temperature.

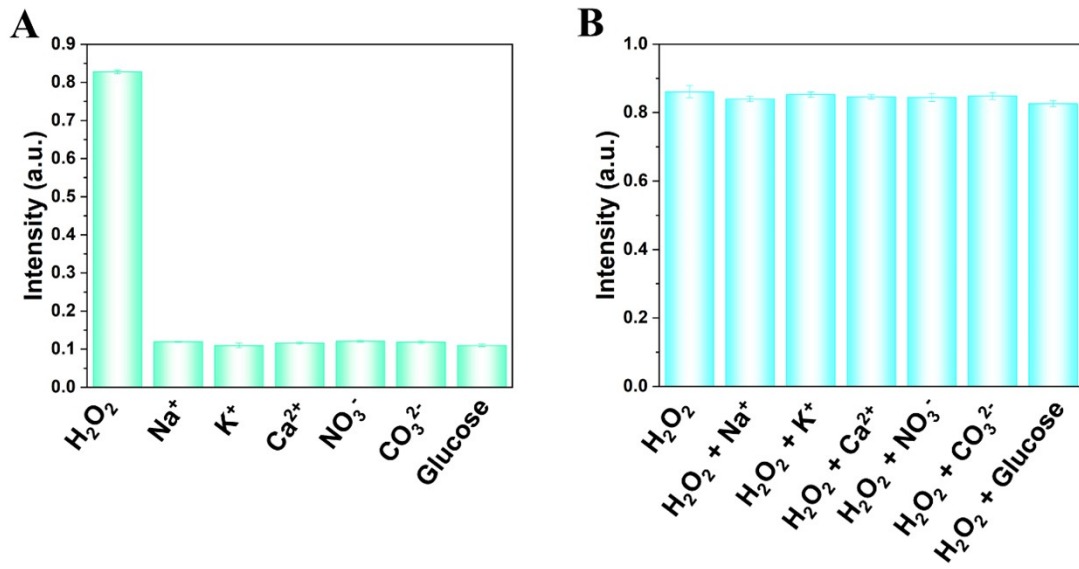

Fig. S5. The selectivity and anti-interference of the proposed sensing for  $H_2O_2$  over other interferents.

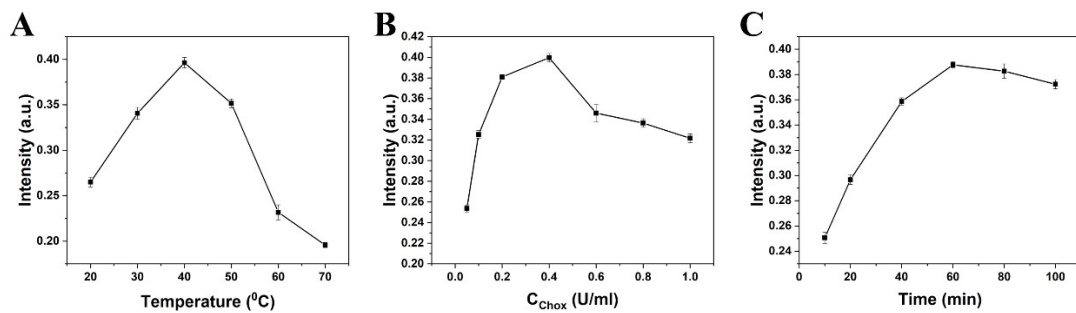

Fig. S6. Effect of Chox concentration, incubation temperature and incubation time on the detection of cholesterol.

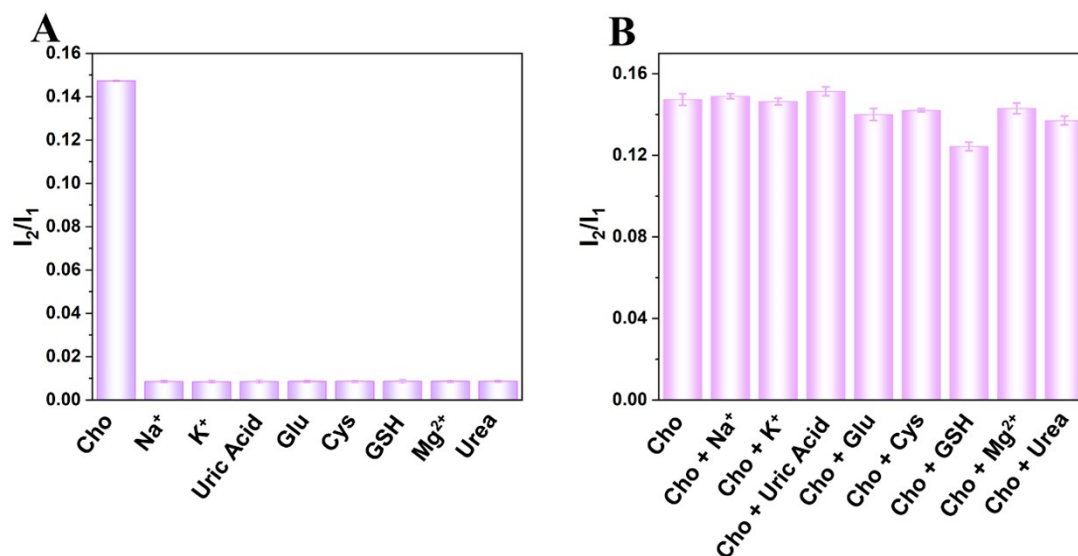

Fig. S7. The selectivity and anti-interference of the proposed sensing for cholesterol over other interferents.

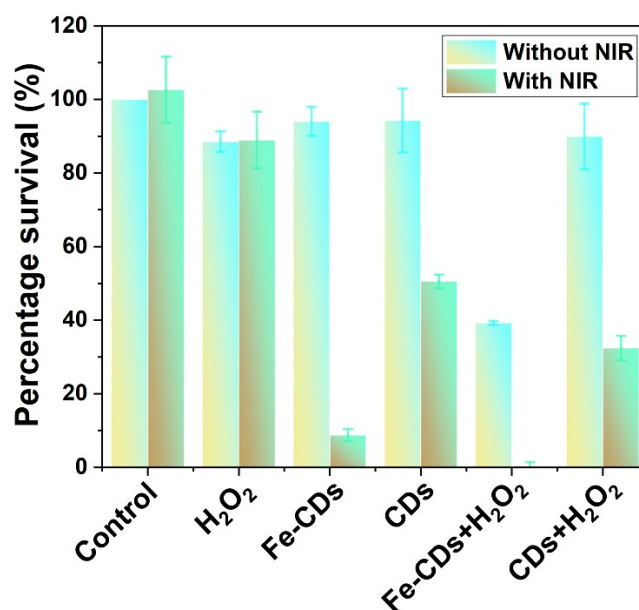

Fig. S8. Survival rates of *E. coli* with different treatments.

Table S1 Comparison of various methods for the determination of H<sub>2</sub>O<sub>2</sub>.

| Method           | Materials        | Liner range ( $\mu\text{M}$ ) | LOD ( $\mu\text{M}$ ) | Reference |
|------------------|------------------|-------------------------------|-----------------------|-----------|
| Electrochemistry | AuNPs/porous GaN | 10-100                        | 2                     | 1         |

|                  |                           |                      |      |           |
|------------------|---------------------------|----------------------|------|-----------|
| Fluorometry      | CdSe@ZnS/AgNCs            | 0.5-60               | 0.3  | 2         |
| Fluorometry      | CdTe QDs                  | 10-125               | 0.3  | 3         |
| Ratiometric      | C-dots/Ag NPs             | 10-100               | 1.39 | 4         |
| Fluorometry      |                           |                      |      |           |
| Electrochemistry | GC/rGO-Nf@Ah <sub>6</sub> | 1-10                 | 1.78 | 5         |
| Colorimetry      | Ce(OH)CO <sub>3</sub>     | 0-80                 | 0.3  | 6         |
| Colorimetry      | Fe-CDs                    | 0.5-100&200-<br>1500 | 0.16 | This work |
| Ratiometric      | Fe-CDs                    | 1-500                | 0.14 | This work |
| Fluorometry      |                           |                      |      |           |

Table S2 Determination of cholesterol in serum samples by colorimetric and fluorometric methods (n = 3).

| Sample  | Colorimetric mode    |                     |                 |            | Fluorometric mode    |                     |                 |            |
|---------|----------------------|---------------------|-----------------|------------|----------------------|---------------------|-----------------|------------|
|         | Spiked<br>( $\mu$ M) | Found<br>( $\mu$ M) | Recovery<br>(%) | RSD<br>(%) | Spiked<br>( $\mu$ M) | Found<br>( $\mu$ M) | Recovery<br>(%) | RSD<br>(%) |
| Serum 1 | 0                    | 62.3                |                 | 1.4        | 0                    | 62.2                |                 | 0.7        |
|         | 50                   | 112.6               | 100.6           | 3.4        | 10                   | 72.3                | 101.7           | 0.5        |
|         | 100                  | 164.3               | 102.0           | 1.1        | 20                   | 81.9                | 98.6            | 0.8        |
| Serum 2 | 0                    | 55.8                |                 | 1.7        | 0                    | 56.6                |                 | 1.1        |
|         | 50                   | 107.0               | 102.3           | 1.4        | 10                   | 67.5                | 108.5           | 1.1        |
|         | 100                  | 156.1               | 100.3           | 2.6        | 20                   | 76.1                | 97.2            | 0.2        |
| Serum 3 | 0                    | 46.2                |                 | 1.8        | 0                    | 47.4                |                 | 0.7        |
|         | 50                   | 95.0                | 97.7            | 1.8        | 10                   | 57.7                | 102.9           | 0.9        |
|         | 100                  | 143.3               | 97.1            | 2.9        | 20                   | 67.4                | 100.0           | 0.2        |
| Serum 4 | 0                    | 27.8                |                 | 2.3        | 0                    | 26.6                |                 | 0.9        |
|         | 50                   | 76.9                | 98.2            | 3.9        | 10                   | 37.4                | 108.7           | 1.4        |
|         | 100                  | 123.1               | 95.3            | 2.5        | 20                   | 47.3                | 103.8           | 0.4        |

## References

1. M. R. Zhang, X. Q. Chen and G. B. Pan, *Sensor. Actuat. B-Chem.*, 2017, **240**, 142-147.
2. Z. Q. Zhou, L. Y. Yang, L. Huang, Y. P. Liao, Y. Liu and Q. Xiao, *Anal. Chim. Acta.*, 2020, **1106**, 176-182.
3. Y. B. Wang, M. Yang, Y. K. Ren and J. Fan, *Microchim. Acta*, 2019, **186**.
4. J. L. Ma, B. C. Yin, X. Wu and B. C. Ye, *Anal. Chem.*, 2017, **89**, 1323-1328.
5. N. Yusoff, P. Rameshkumar, M. S. Mehmood, A. Pandikumar, H. W. Lee and N. M. Huang, *Biosens. Bioelectron.*, 2017, **87**, 1020-1028.
6. X. Zhang, X. Q. Bi, W. H. Di and W. P. Qin, *Sensor. Actuat. B-Chem.*, 2016, **231**, 714-722.
